# Supplementary material for: Unaffected Perceptual Thresholds for Biological and Non-Biological Form-from-Motion Perception in Autism Spectrum Conditions
Source: PubMed Central journal article supplement (PMC2956672; doi:10.1371/journal.pone.0013491), 2010-10-18
Supplement: pone.0013491.s001.pdf [file pone.0013491.s001.pdf]

Table S1:

|                                             | Stimuli                                                                             | Task                                                                                                                                  | Participants                                                                             | Diagnosis                                                         | Control condition?                                                                                                                                                                                | Results                                                                                                                                                                                                                                                          | Bio. motion impairment in ASC group?        |
|---------------------------------------------|-------------------------------------------------------------------------------------|---------------------------------------------------------------------------------------------------------------------------------------|------------------------------------------------------------------------------------------|-------------------------------------------------------------------|---------------------------------------------------------------------------------------------------------------------------------------------------------------------------------------------------|------------------------------------------------------------------------------------------------------------------------------------------------------------------------------------------------------------------------------------------------------------------|---------------------------------------------|
| Moore, Hobson & Lee, 1997                   | 40ms to 5000ms 5- & 10-pPLDs of walking person                                      | Name what the dots are stuck to.                                                                                                      | ASC: N = 17 (Range = 10-19years). Ctrls: learning disabled, matched on CA and BPVS.      | ASD with impaired language processing                             | 40ms to 5000ms 5- & 10-pPLDs moving household objects                                                                                                                                             | No difference between the groups in recognition of the objects by their motions. However, ASC group had difficulty with spontaneously describing and recognising portrayals of emotion.                                                                          | Yes - emotion recognition only              |
| Blake, Turner, Smoski, Pozdol & Stone, 2003 | 1sec 12-pPLD of familiar activities or phase scrambled version of the same stimulus | "Does it move like a person?" - respond "yes" or "no"                                                                                 | ASC: N = 12 (Range = 8-10yrs). Ctrl: N = 9 (Range = 5-10 yrs). Ctrl CA matched to ASC MA | Licensed psychologist diagnosis confirmed with ADOS-G & CARS      | Global-form task: Each quadrant of the screen contained short lines of randomly determined orientation, one quadrant contained a quasi-circular target. Task: Which quadrant contains the target? | The Ctrl group had significantly better d' scores for the BM task than the ASC group. Significant negative correlation between 'level' of ASC (ADOS and CARS scores) and d' score. No significant difference between the groups on the global form control task. | Yes                                         |
| Herrington et al., 2007                     | 1sec 13-pPLD walking on the spot (generated by Cutting algorithm)                   | Report walking direction of the PLW                                                                                                   | ASC: N = 10, M = 27.6yrs, SD = 7.1 yrs. Ctrl: N = 10, M = 25.6yrs, SD = 4.9 yrs.         | Clinical diagnosis of AS                                          | Scrambled versions of the PLDs - each dot displaced by max. of 65 pixels in vertical dimension.                                                                                                   | No difference between the groups on reporting walking direction. However, ASC group showed multiple hypoactivation (inc. STG and human MT+V5)                                                                                                                    | No - but hypoactivation in bio motion areas |
| Hubert et al., 2007                         | 5sec PLD of one of a) 10 actions b) 5 subjective states c) 5 emotional actions      | Describe orally what is happening in the movie                                                                                        | ASC: N = 19, M = 21y6m, SD = 6y1m. Ctrls: N = 19, M = 24y4m, SD = 8y6m.                  | Clinical diagnosis of HFA or AS confirmed by ADI-R and ASSQ scale | 5sec PLD of one of 5 objects                                                                                                                                                                      | ASC group produced less accurate descriptions for the emotion PLDs only.                                                                                                                                                                                         | Yes but only on emotion labelling           |
| Freitag et al., 2008                        | 1.5sec 15-pPLD of walker                                                            | In scanner: assemble each PLD into a figure. Outside scanner: indicate with a button press if you see a walking person or a scrambled | ASC: N = 15, M = 17.5yrs, SD = 3.5yrs. Ctrls: N = 15 group-matched on age, sex and IQ.   | Clinical diagnosis confirmed with ADI-R and ADOS-G.               | Scrambled versions of PLDs (spatially scrambled & velocity profile replaced with constant velocity profile)                                                                                       | No difference between groups on behavioural task. ASC group showed multiple hypoactivation (inc. STS) for viewing biomotion versus scrambled compared to                                                                                                         | No - but hypoactivation in bio motion areas |

|                                         |                                                                                                                                                                                                                                                                                                                                                                                                                                                                 |                                                                                                                                                                                                                            |                                                                                                                                                          |                                                             |                                       |                                                                                                                                                                                                                                                                                                                                                                             |                                                                                  |
|-----------------------------------------|-----------------------------------------------------------------------------------------------------------------------------------------------------------------------------------------------------------------------------------------------------------------------------------------------------------------------------------------------------------------------------------------------------------------------------------------------------------------|----------------------------------------------------------------------------------------------------------------------------------------------------------------------------------------------------------------------------|----------------------------------------------------------------------------------------------------------------------------------------------------------|-------------------------------------------------------------|---------------------------------------|-----------------------------------------------------------------------------------------------------------------------------------------------------------------------------------------------------------------------------------------------------------------------------------------------------------------------------------------------------------------------------|----------------------------------------------------------------------------------|
|                                         |                                                                                                                                                                                                                                                                                                                                                                                                                                                                 | version.                                                                                                                                                                                                                   |                                                                                                                                                          |                                                             |                                       | controls. Activation in intraparietal sulcus and right STS for motion (both bio and scrambled versus fixation) correlated negatively with severity of symptoms.                                                                                                                                                                                                             |                                                                                  |
| Parron et al., 2008                     | 5sec PLD of one of a) 10 actions b) 5 subjective states c) 5 emotional actions                                                                                                                                                                                                                                                                                                                                                                                  | Describe orally what is happening in the movie                                                                                                                                                                             | ASC: N = 23, M = 11y7m, SD = 3y2m. Ctrl: N = 23, M = 12yrs, SD = 2y5m                                                                                    | Clinical diagnosis confirmed with ADI-R and ASSQ            | 5sec PLD of one of 5 objects          | ASC group produced less accurate descriptions for the emotion PLDs only.                                                                                                                                                                                                                                                                                                    | Yes but only on emotion labelling                                                |
| Murphy, Brady, Fitzgerald & Troje, 2009 | 0.92sec 11pPLD of actor walking masked by spatially- and phase-scrambled PL dots                                                                                                                                                                                                                                                                                                                                                                                | Report direction of walking                                                                                                                                                                                                | ASC: N = 16, M = 25.56yrs, SD = 7.67yrs. Ctrl: N = 16, M = 26.40yrs, SD = 2.85yrs, gender-matched but significantly higher non-verbal IQ than ASC group. | AS (n = 15), ASD (n = 1) diagnosed by experienced clinician | Scrambled versions of the PLDs.       | ASC participants were slower overall but there were no differences between the groups in terms of accuracy.                                                                                                                                                                                                                                                                 | No                                                                               |
| Annaz et al., 2009                      | 1sec 13-pPLD of an actor either walking on the spot, running, throwing, kicking or star-jumping.                                                                                                                                                                                                                                                                                                                                                                | Report if the dots are moving like a person or not                                                                                                                                                                         | ASC: N = 23, M = 8y1m, SD = 1y1m. Ctrl: N = 34, M = 8y3m, SD = 2y3m.                                                                                     | Clinical diagnosis of ASC confirmed with ADOS               | Phase-scrambled versions of the PLDs. | Groups did not differ in performance at onset (4-5 years). However, performance improved with age for the TD group but not for the ASC group.                                                                                                                                                                                                                               | Not at younger ages but unlike Ctrl children with ASC failed to improve with age |
| Annaz et al., 2009                      | BM: PLD of actor walking on the spot embedded in scrambled PLD dots versus scrambled PLD dots. Coherent motion (CM): signal elements moving coherently versus noise elements moving randomly. Form-from-motion (FFM): signal elements arranged in a vertical rectangle surrounded by noise elements versus signal elements arranged in a horizontal rectangle surrounded by noise elements (figure and noise elements moved coherently in opposite directions). | 2AFC: Which panel contains the target? BM target = dots that look like a person walking. CM: target = dots that are moving in a coherent way like swimming fish. FFM: target = a rectangle that is standing up on its end. | ASC: N = 23, M = 8yr1m, SD=1y1m. Ctrl: N =34, M = 8y3m, SD = 2y3m.                                                                                       | Clinical diagnosis of ASC confirmed with ADOS               | Static contour integration task       | BM: Groups did not differ in performance at onset (4-5 years). However, performance improved with age for the Ctrl group but not for the ASC group. CM: ASC group demonstrated significantly higher MCTs than the Ctrl group. FFM: Developmental trajectories comparable but ASC group demonstrated significantly higher thresholds (more signal required) than Ctrl group. | Not at younger ages but unlike Ctrl children with ASC failed to improve with age |

|                                  |                                                                                                                                                                                                                                                                                                                                                                        |                                                                                                                           |                                                                                                                                      |                                                                                        |                                                                                                                                                                                                                                        |                                                                                                                                                                                                                                                                                                                                                                                                                                                                                                                                                                                     |     |
|----------------------------------|------------------------------------------------------------------------------------------------------------------------------------------------------------------------------------------------------------------------------------------------------------------------------------------------------------------------------------------------------------------------|---------------------------------------------------------------------------------------------------------------------------|--------------------------------------------------------------------------------------------------------------------------------------|----------------------------------------------------------------------------------------|----------------------------------------------------------------------------------------------------------------------------------------------------------------------------------------------------------------------------------------|-------------------------------------------------------------------------------------------------------------------------------------------------------------------------------------------------------------------------------------------------------------------------------------------------------------------------------------------------------------------------------------------------------------------------------------------------------------------------------------------------------------------------------------------------------------------------------------|-----|
| Koldewyn, Whitney & Rivera, 2009 | Coherent motion (CM): 2sec videos of dots moving either left or right with one of six coherence levels from 0° (coherent motion) to 360°(random motion). Biological motion (BM): PLDs of actor walking masked with the CM stimuli (high coherence of the background stimulus makes PL walker easy to identify, when coherence is low PL walker difficult to identify). | CM: indicate direction of global motion. CF: indicate concentric or expanding pattern. BM: indicate direction of walking. | ASC: N = 30, M = 15.2yrs, SD = 2.64yrs, TD: N = 32, M = 15.78yrs, SD = 2.41yrs                                                       | ADOS: social M = 8.90, SD = 2.55, comm M = 5.07, SD = 1.51, total M = 13.97, SD = 3.76 | Coherent form task:<br>Concentric glass patterns                                                                                                                                                                                       | Biological motion: ASC group exhibited significantly lower 75% thresholds. This difference is still significant if IQ is entered as a covariate. Coherent motion: ASC group exhibited significantly lower 75% thresholds. However, this difference is non-significant if IQ is entered as a covariate. Coherent Form: no group differences. Performance on bio motion and coherent motion was correlated in the ASC group but not in the control group. Performance on the coherent form task was correlated with performance on the coherent motion task for Ctrl but not ASC.     | Yes |
| Atkinson, 2009                   | 3 sec PL or full-light displays of either emotions or actions.                                                                                                                                                                                                                                                                                                         | indicate either the emotion (5 choices) or the action (9 choices) depicted                                                | ASC: N = 13, Range = 18-58 yrs. Ctrl: N = 16, Range = 17-54 years. Group-matched on age, full-scale IQ, verbal IQ, & performance IQ. | AS (n = 12), HFA (n = 1) confirmed by experienced clinician                            | Motion Coherence (MC) task: 750 dots moving in one of 5 direction randomly from frame to frame, a propotional of the dots moved coherently right or left. The task was to say if the coherently moving dots were moving left or right. | ASC group were significantly less accurate than the Ctrl group in classifying anger and happiness and matginally, but not significantly less accurate in classifying fear and sadness. MC accuracy significantly greater in Ctrl group than ASC group and significantly greater MCTs for the ASC group compared to the Ctrl group (borderline significantly: p = 0.054). ASC individuals with high MCT exhibited poorer emotion classification, this relationship did not hold for the Ctrl group. ASC group less accurate than Ctrl group in classifying non-instrumental actions. | Yes |

|                                           |                                                                                                                                                                                                                  |                                                                                                                 |                                                                                                                         |                                                   |                                                                                                                                                                    |                                                                                                                                                                                                                 |                                                                                                 |
|-------------------------------------------|------------------------------------------------------------------------------------------------------------------------------------------------------------------------------------------------------------------|-----------------------------------------------------------------------------------------------------------------|-------------------------------------------------------------------------------------------------------------------------|---------------------------------------------------|--------------------------------------------------------------------------------------------------------------------------------------------------------------------|-----------------------------------------------------------------------------------------------------------------------------------------------------------------------------------------------------------------|-------------------------------------------------------------------------------------------------|
| Cook, Saygin, Swain & Blakemore, 2009     | 2sec animations of human hand moving vertically across the screen with either minimum-jerk biological motion (natural motion) constant velocity (unnatural motion) or linear combinations of these two extremes. | 2AFC: Pick the less natural animation                                                                           | ASC: N = 16, M = 34.1yrs, SD = 12.4 yrs. Ctrl: N = 16, M = 33.3yrs, SD = 12.2yrs.                                       | Clinical diagnosis confirmed with ADOS. M = SD =  | 2sec animations of tennis ball moving vertically down the screen with either gravitational motion, constant velocity or linear combinations of these two extremes. | ASC group exhibited significantly poorer performance than the Ctrl group when required to pick the less natural hand animation but not when required to pick the less natural tennis ball animation.            | Yes                                                                                             |
| Klin, Lin, Gorrindo, Ramsay & Jones, 2009 | PLD of a child's game accompanied with audio                                                                                                                                                                     | PLD and scrambled version shown on the screen simultaneously. Passive viewing task. Eyetracking data collected. | ASC: N = 21, M = 2.21yrs, SD = 0.54yrs. Ctrl: N = 39, M = 1.99yrs, SD = 0.66yrs. DD: N = 16, M = 2.02yrs, SD = 0.62yrs. | Clinical diagnosis confirmed with ADI-R and ADOS. | Inverted version of the PLD played backwards.                                                                                                                      | Whereas Ctrl and DD control groups exhibited preferential looking towards the upright PLD the ASC group did not. However, the ASD group exhibited preferential looking towards point of audio-visual synchrony. | Yes but due to focus on AV contingency (ie. not necessarily due to poor bio. motion processing) |
